# Supplementary material
Source: PubMed Central journal article supplement (PMC8114553)
Supplement: advancesADV2020004112-suppl1.pdf [file advancesADV2020004112-suppl1.pdf]

## Supplementary Material

### Supplementary Figure and Table Legends

**Supplement Figure 1. Optimization of CRISPR KO in MKs. A-B:** Surface expression of  $\alpha$ IIb (% CD41+) on day 13 MKs as measured by flow cytometry **A.** after transfection with negative control crRNA (CR) or three different crRNA (A, B, or C) predicted to target gene ITGA2B or **B.** after transfection of different numbers of CD34+ cells with negative control or ITGA2B crRNA B. **C.** Representative Sanger sequencing traces from day 13 MKs targeted with negative control or ITGA2B crRNA. Note the clearly defined single nucleotide peaks in control, whereas multiple overlapping nucleotide peaks surround the cut site, a characteristic of the accumulation of insertions and deletions. Insertions/deletions (indels) were estimated by Synthago software and in **D.** mean +/- SEM summary score of knockout efficiency is shown. **E.** Representative flow cytometry analysis of day 13 MK surface expression of CD41, GPVI, or B2M MK after transfection with negative control, ITGA2B, GP6, or B2M crRNA (see figure 2B for MK gating strategy). **F.** mean +/- SEM summaries of the percent of positive cells for each protein represented in E. Surface proteins analyzed are indicated on the y-axis, and crRNA targeted gene on the x-axis. N=3-6 individual cords per group. Paired t-tests.

**Supplement Figure 2. Expansion of CRISPR KO MKs.** Fold expansion of viable cells between day 6 and 13 of culture after CRISPR transfection of  $0.5 \times 10^6$  CD34+ cells on day 5 of culture.

**Supplement Figure 3. Microscopy analysis of CRISPR KO MKs.** Representative fluorescence confocal microscopy images of CRISPR KO MKs on day 13 of culture. MKs were fixed in suspension with 2% paraformaldehyde and centrifuged onto glass coverslips. Cells were permeabilized with 0.1% Triton X 100 and stained with phalloidin 488, wheat germ agglutinin (WGA) 555, and DAPI, and imaged by confocal microscopy. Cells ranged in size from 10-37 microns, which is consistent with previously published reports<sup>1,2</sup>. No apparent differences in morphology between groups were determined by an observer blinded to groups.

**Supplement Figure 4. PKC activity in GP6 CRISPR KO MKs.** Day 13 negative CRISPR and GP6 CRISPR KO MKs at baseline or after 5 minute stimulation with thrombin (1 U/mL) or convulxin (1 µg/mL) were assessed by western blot for PKC activity using an antibody mixture that recognizes the Phospho-PKC Substrate Motif [(R/K)XpSX(R/K)]. GAPDH is used as loading control. Shown are MKs from 2 independent cords with densitometry analysis below each.

**Supplement Figure 5. Mean Fluorescence intensity (MFI) of integrin activation and surface P-selectin of CRISPR KO MKs in response to platelet agonists.** Day 13 CRISPR KO and control MKs were treated for 10 minutes with thrombin (1 U/mL), CRP (2 µg/mL), or 2-meSADP (200 nM); stained for activated alpha2b/beta3 (PAC-1), and P-selectin; and analyzed by flow cytometry as described in figure legend 2B. Shown are normalized mean +/- SEM summaries of the MFI for **A.** PAC-1 or **B.** P-selectin staining. n=3-9 independent cords per group. Mixed effects analysis with Dunnett's adjustment

for multiple comparisons. The unfilled circle represents an outlier (Grubb's) removed for statistical analysis.

**Supplement Figure 6. MFI of integrin activation and surface P-selectin of RASGRP2 CRISPR KO MKs in response to short treatment with platelet agonists.**

day 13 CRISPR KO and control MKs were treated for 2 minutes with thrombin (THR, 1 U/mL), or 3 minutes with convulxin (CVX, 2  $\mu$ g/mL) or CRP (2  $\mu$ g/mL); stained for activated alpha2b/beta3 (PAC-1), and P-selectin; and analyzed by flow cytometry according to the gating strategy described in figure legend 2B. **A-B**: normalized mean  $\pm$  SEM summaries of **A**. PAC-1 MFI or **B**. P-selectin MFI. n=3 independent cords per group. paired t-tests, n=3 per group.

**Supplement Figure 7. Microscopy analysis of COMMD7 KO MKs. A.** Fluorescence confocal microscopy images of negative control versus *COMMD7* KO MKs (representatives shown from 3 independent cords) on day 13 of culture. MKs were prepared for immunofluorescence imaging as described in Supplement Figure Legend 3 with wheat germ agglutinin (WGA), phalloidin, and DAPI. The mean and median diameters of MKs as measured from 3 cords (104 Negative control and 95 *COMMD7* KO MKs) did not differ between groups (means:  $16.1 \pm 3.4$  and  $15.7 \pm 3.0$ ; medians: both 15.0). The diameters were consistent with previously published<sup>2</sup> diameters of human MKs found in neonates (mean 15.3 microns) and in adult bone marrow following transplant of cord blood CD34+ cells (median 16.7 microns). **B.** Transmission Electron Microscopy (TEM) images (representatives shown from 3 independent cords) of

negative control versus CRISPR KO MKs on day 13 of culture. MKs were fixed in suspension in 2.5% glutaraldehyde in phosphate-buffered saline, followed by processing for TEM as previously described<sup>3</sup>. The yellow box in the top panels place the zoom images below where representative features are labeled in red as GR=Granules (note that granules were the size and shape of platelet granules, but generally less dense than those typically observed by TEM in platelets), DMS=Demarcation Membrane System, MT=Mitochondria, N=Nucleus. No obvious differences in morphology between groups were determined by an observer blinded to groups.

**Supplement Figure 8. *COMMD7* in MKs mediates responses to platelet agonists, activation MFI and total P-selectin expression. A-E,G:** negative control or *COMMD7* KO day 13 MKs were kept at baseline or stimulated with convulxin (2 µg/mL) or thrombin (1 U/mL) for 3 or 10 minutes as indicated, and analyzed by flow cytometry. Viable MKs were gated as in Figure 2B. Shown is the normalized mean +/- SEM of MFI for **A-B)** Pac1, **C)** labeled fibrinogen, **D-E)** surface p-selection, or **G)** surface CD63. Paired t tests, n=5 independent cords per group. **F:** western blot analysis of total P-selectin protein in day 13 negative control and *COMMD7* KO MKs. Densitometry analysis is shown on the right with GAPDH used as loading control. Paired t test, n=3 independent cords per group.

**Supplement Figure 9. PKC activity in *COMMD7* CRISPR KO MKs.** Day 13 negative CRISPR and *COMMD7* CRISPR KO MKs at baseline or after 5 minute stimulation with thrombin (1 U/mL) or convulxin (1 µg/mL) were assessed by western blot for PKC

activity using an antibody mixture that recognizes the Phospho-PKC Substrate Motif [(R/K)XpSX(R/K)]. GAPDH is used as loading control. Shown are MKs from 2 independent cords with densitometry analysis below each.

**Supplement Table 1. RNA-seq analysis of predicted off-target transcripts and genes flanking COMMD7.** RNA was isolated from day 13 negative control CRISPR and COMMD7 CRISPR treated MKs and sequenced. Shown are results from a differential expression analysis of the two genes flanking COMMD7 (DNMT3B, C20orf203) and all genes predicted as off targets (idtDNA). None of the targets were significantly decreased (adjusted p value <0.05) in COMMD7 KO MKs compared to controls. n=3 independent donors per group.

## References

1. Levine RF. Isolation and Characterization of Normal Human Megakaryocytes. *Br. J. Haematol.* 1980;45(3):487–497.
2. Ignatz M, Sola-Visner M, Rimsza LM, et al. Umbilical Cord Blood Produces Small Megakaryocytes After Transplantation. *Biol. Blood Marrow Transplant.* 2007;13(2):145–150.
3. Schwertz H, Köster S, Kahr WHA, et al. Anucleate platelets generate progeny. *Blood.* 2010;115(18):3801–3809.

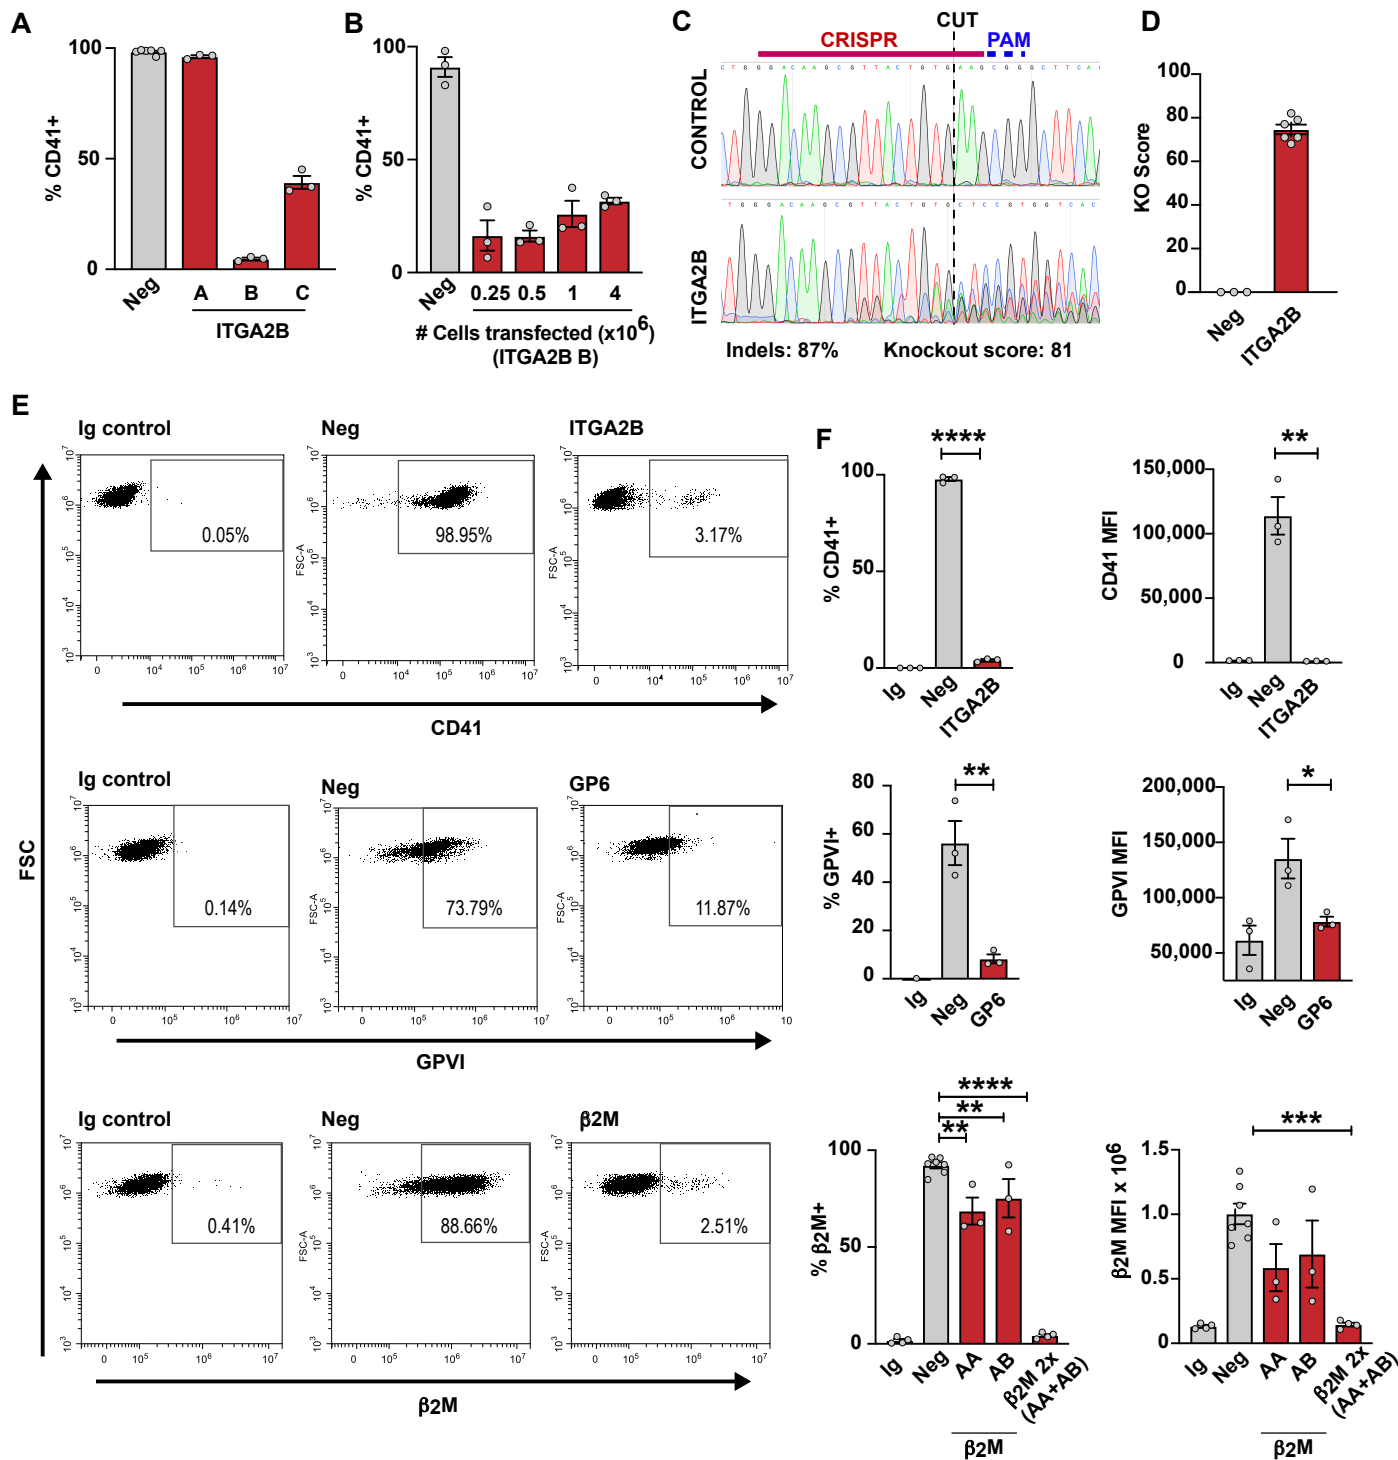

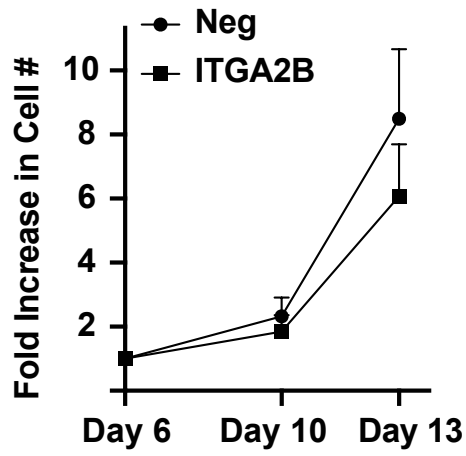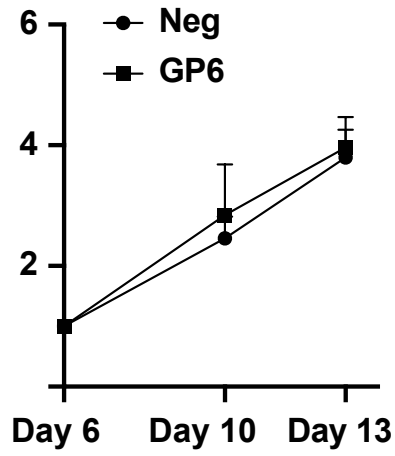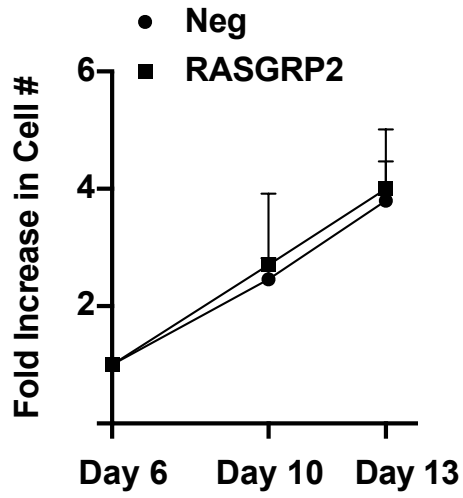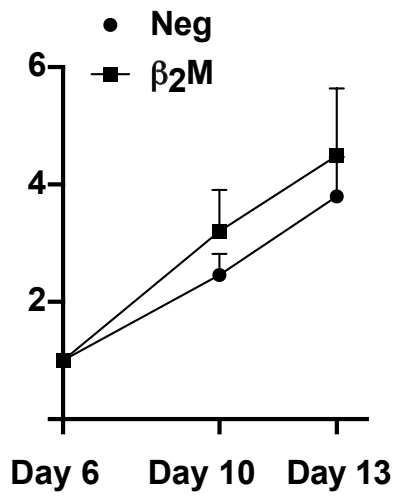

Montenont et. al.  
Supplement Figure 2

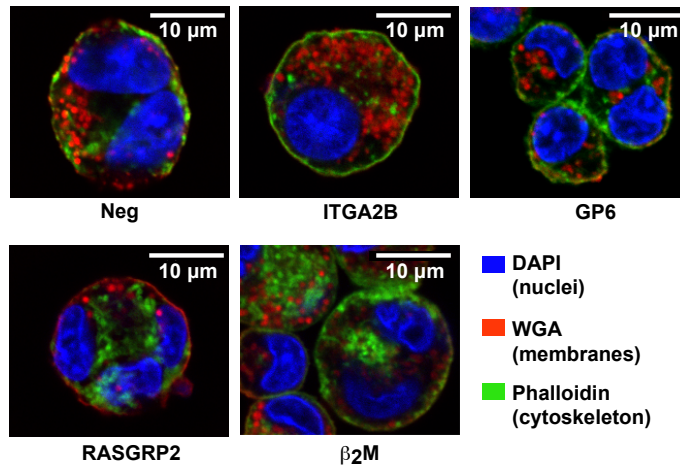

Montenont et. al.  
Supplement Figure 3



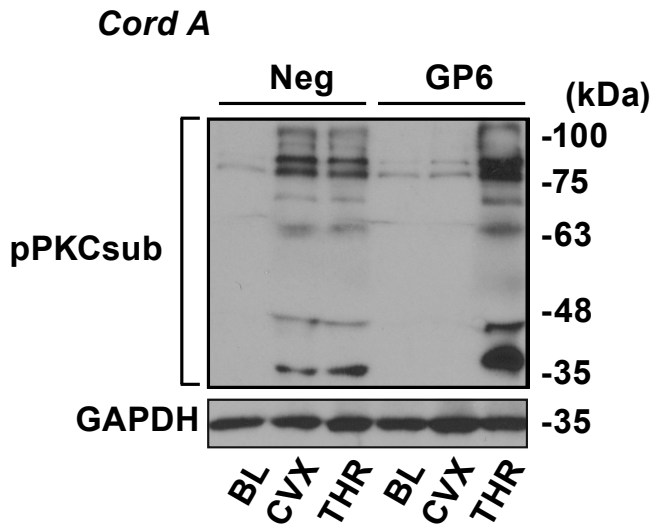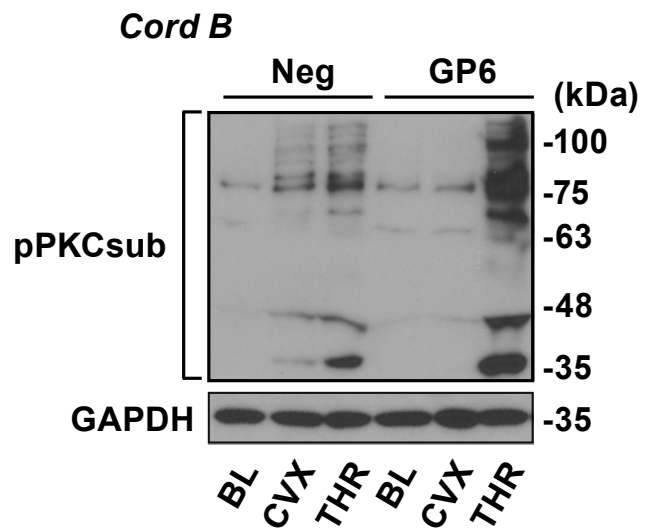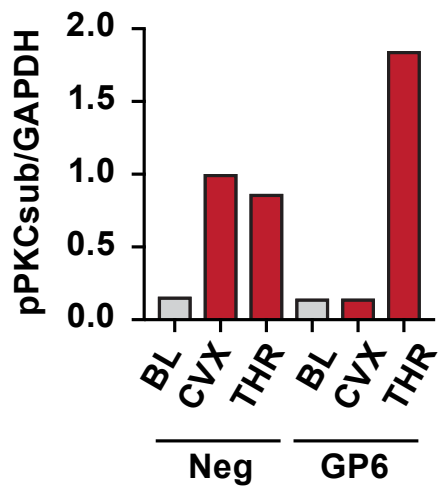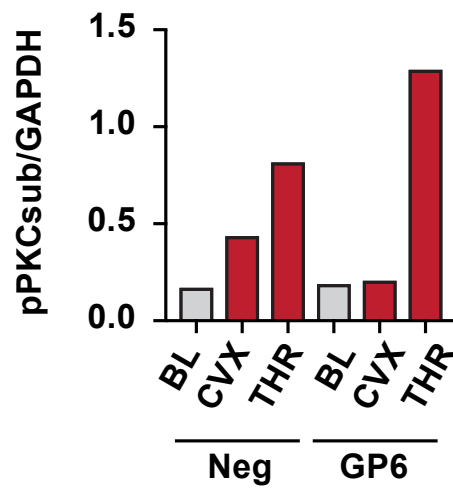

Montenont et. al.  
Supplement Figure 4

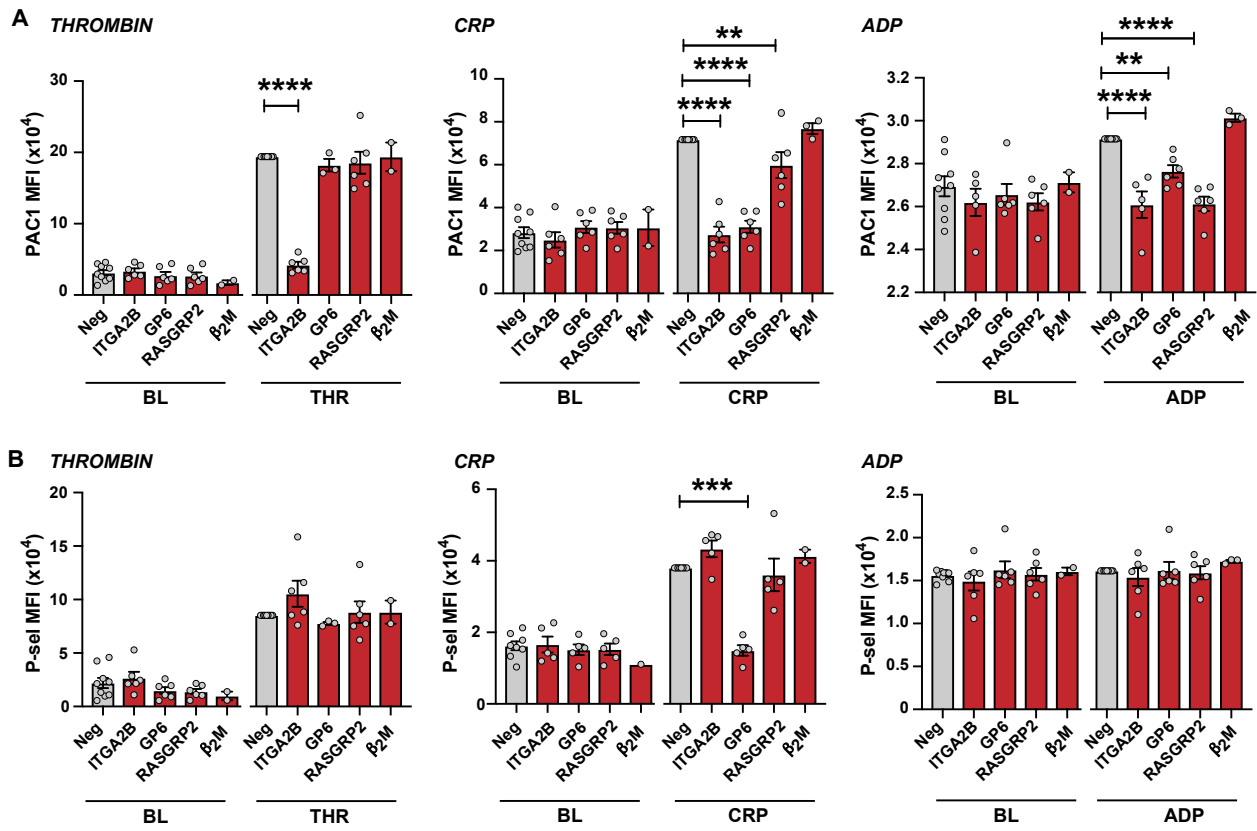

Montenont et. al.  
Supplement Figure 5

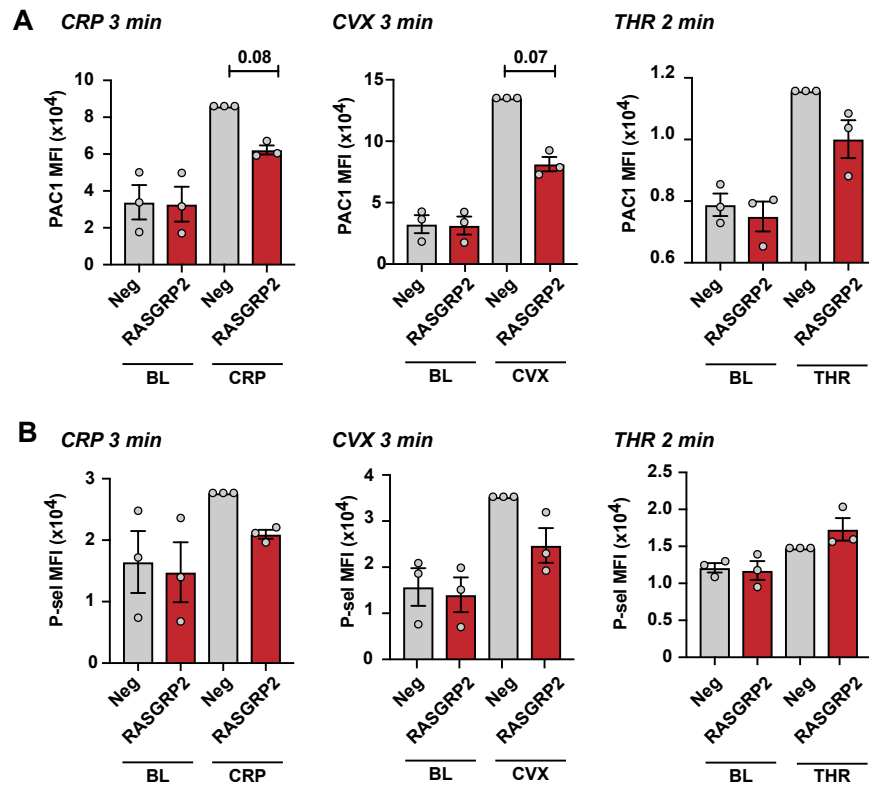

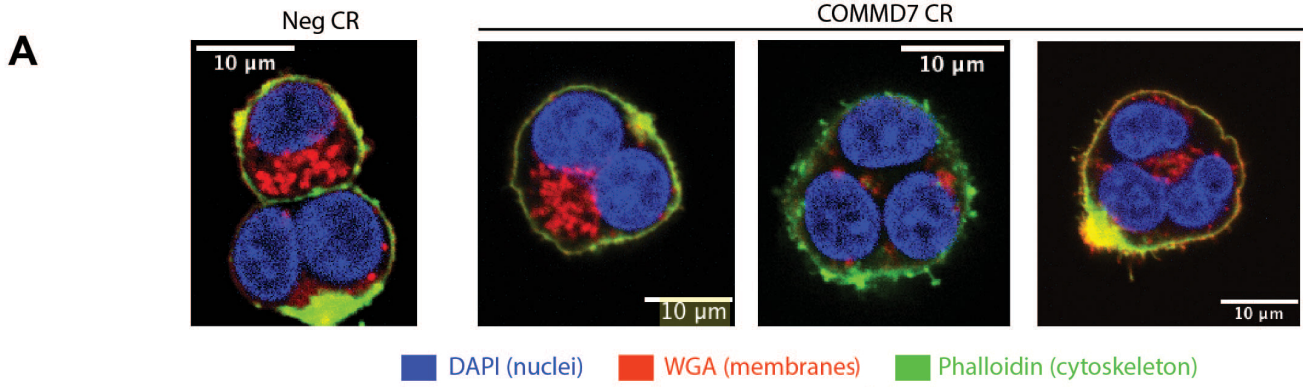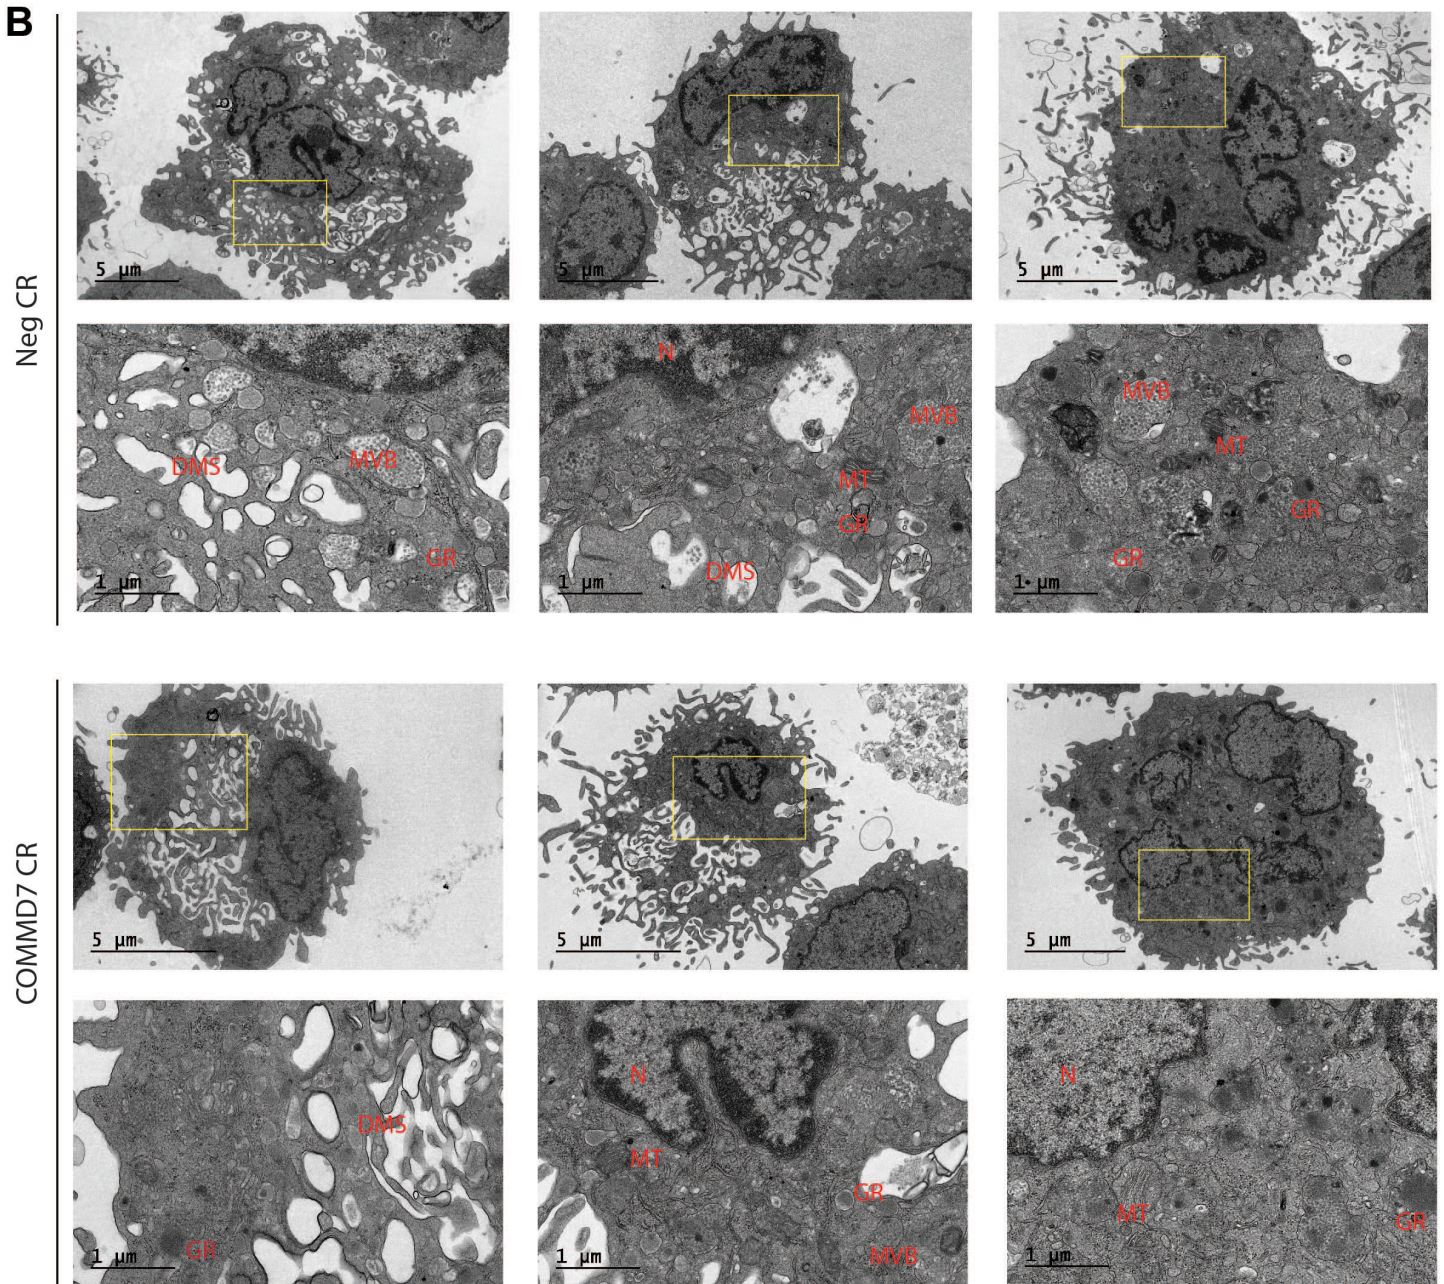

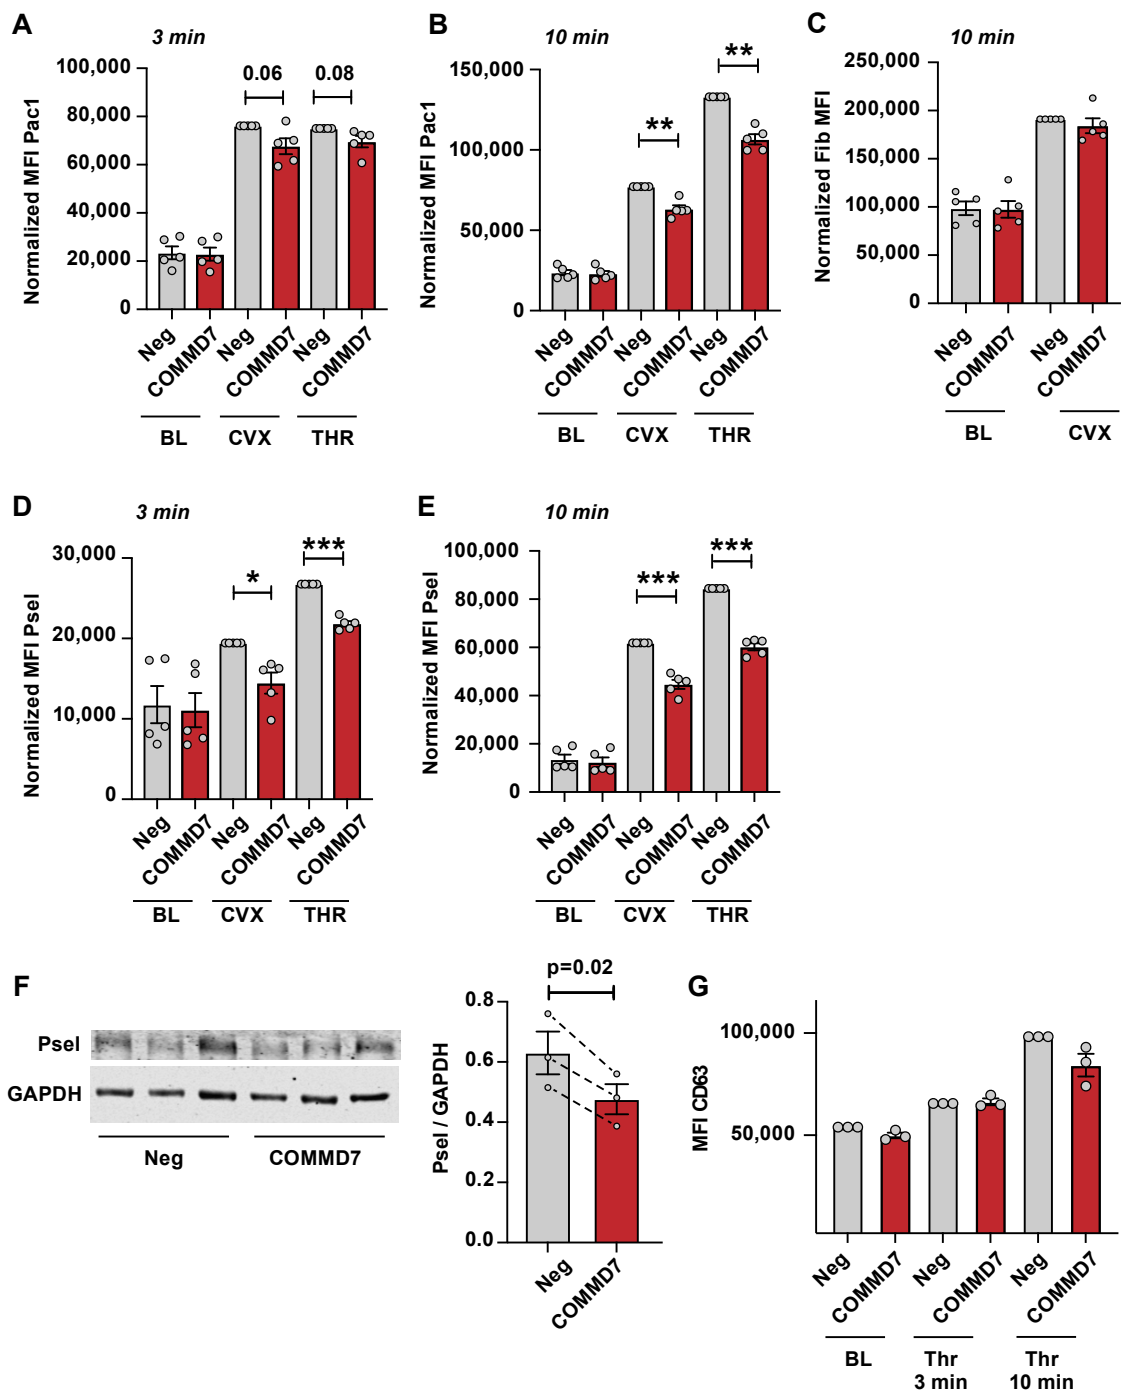

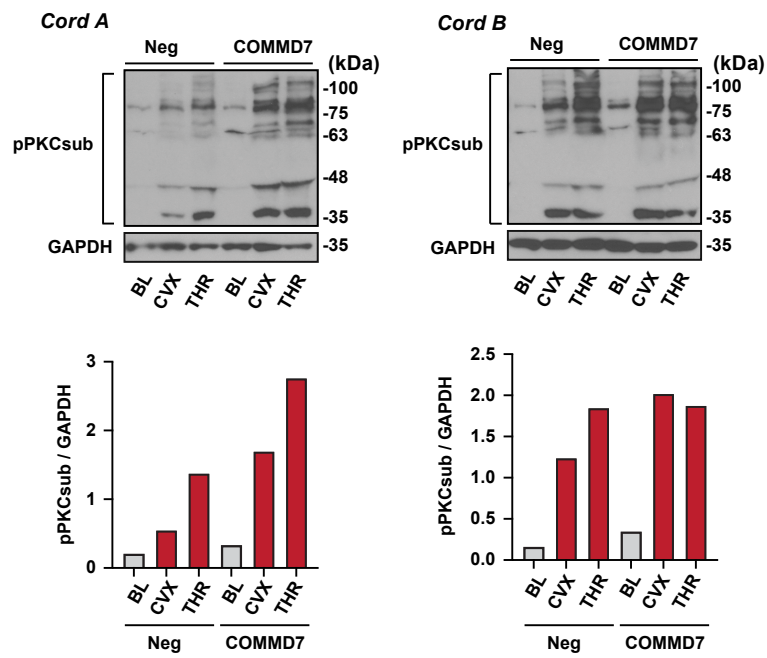

Montenont et. al.  
Supplement Figure 9

| gene_name | description                                   | Direction | log2FoldChange | padj       | Predicted Target Sequence | LOCUS                   |
|-----------|-----------------------------------------------|-----------|----------------|------------|---------------------------|-------------------------|
| CHMP1B    | charged multivesicular body protein 1B        | Down      | -0.25828825    | 0.19068993 | ACCTTCAATCTGATCATTCT      | chr18:11852421          |
| C20orf203 | chromosome 20 open reading frame 203          | Down      | -0.07551727    | 0.89169981 | NA - Flanks COMMD7        | chr20:32629625-32653981 |
| TTL4      | tubulin tyrosine ligase like 4                | Down      | -0.04569523    | 0.9334525  | ACCTCCAGCCAGATCAGGCT      | chr2:218740068          |
| ENO1      | enolase 1                                     | Up        | 0.618978665    | 1.03E-05   | ACCTCCAGTCAGATCGTTCT      | chr1:8870742            |
| MAP2K3    | mitogen-activated protein kinase kinase 3     | Up        | 0.465150697    | 0.0021866  | ACCCATGGCCCAGCGCCCAA      | chr17:21288008          |
| DNMT3B    | DNA methyltransferase 3 beta                  | Up        | 0.322030301    | 0.04679013 | NA - Flanks COMMD7        | chr20:32760385-32811356 |
| ZC3H12A   | zinc finger CCCH-type containing 12A          | Up        | 0.45124044     | 0.09849093 | ACCTATGCCCCATCAGGCAG      | chr1:37482999           |
| PDK1      | pyruvate dehydrogenase kinase 1               | Up        | 0.199944223    | 0.3240794  | ACAAGCAATCAGTTCAGTTT      | chr2:172596721          |
| PASK      | PAS domain containing serine/threonine kinase | Up        | 0.230957466    | 0.37178375 | TCCAGCAATCAGCTCAGTCT      | chr2:241132914          |
| FOXO1     | forkhead box O1                               | Up        | 0.029586738    | 0.94500825 | ACATATGGCCAATCCAGCAT      | chr13:40560198          |

Supplement Table 1
